# Supplementary material for: Rheological characterization of poly-dimethyl siloxane formulations with tunable viscoelastic properties
Source: Royal Society of Chemistry journal article supplement (doi:10.1039/d1ra03548g), 2021-01-01
Supplement: d1ra03548g1.pdf [file d1ra03548g1.pdf]

# Journal Name

## ARTICLE TYPE

Cite this: DOI: 00.0000/xxxxxxxxxx

### **ESI: Rheological Characterization of Poly-dimethyl Siloxane Formulations with Tunable Viscoelastic Properties**

Thomas J. Petet, Jr.,<sup>a</sup> Halston E. Deal,<sup>b,e</sup> Hanhsen S. Zhao,<sup>a</sup> Amanda Y. He,<sup>c</sup> Christina Tang,<sup>a</sup> and Christopher A. Lemmon<sup>a,†</sup>

Supplemental Information

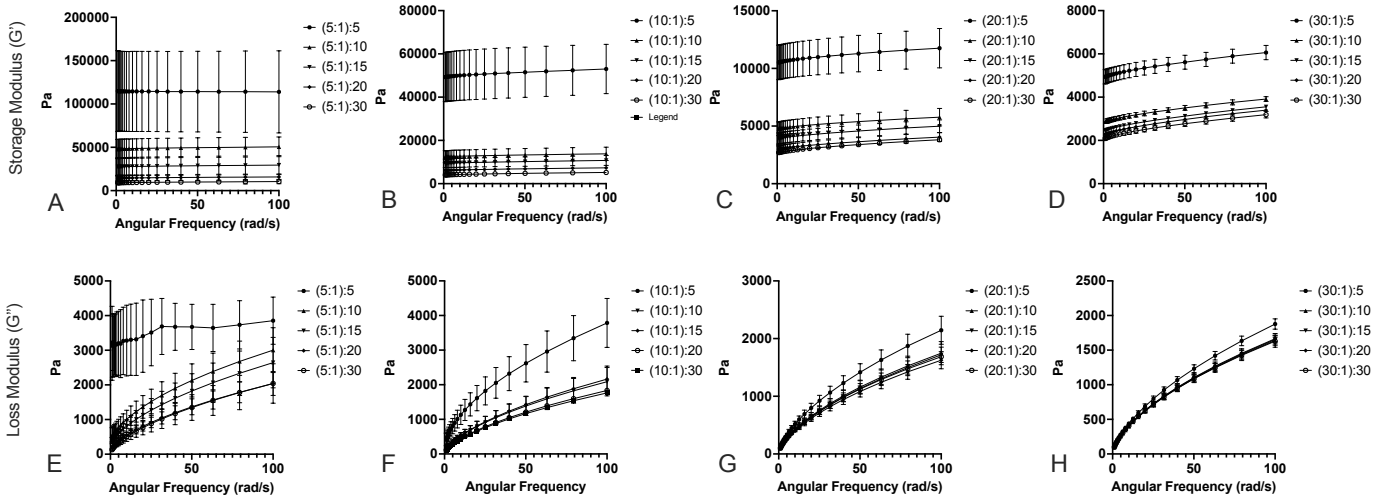

Fig. 1 Mechanical Properties as a Function of Angular Frequency. A-D) Storage modulus ( $G'$ ) versus angular frequency for (A) 5:1 B:C Sylgard 184, (B) 10:1 B:C Sylgard 184, (C) 20:1 B:C Sylgard 184, and (D) 30:1 B:C Sylgard 184. E-H) Loss modulus ( $G''$ ) versus angular frequency for (E) 5:1 B:C Sylgard 184, (F) 10:1 B:C Sylgard 184, (G) 20:1 B:C Sylgard 184, and (H) 30:1 B:C Sylgard 184. Error bars represent standard error. Formulations are labeled in the legends according to the notation (184B:184C):527.

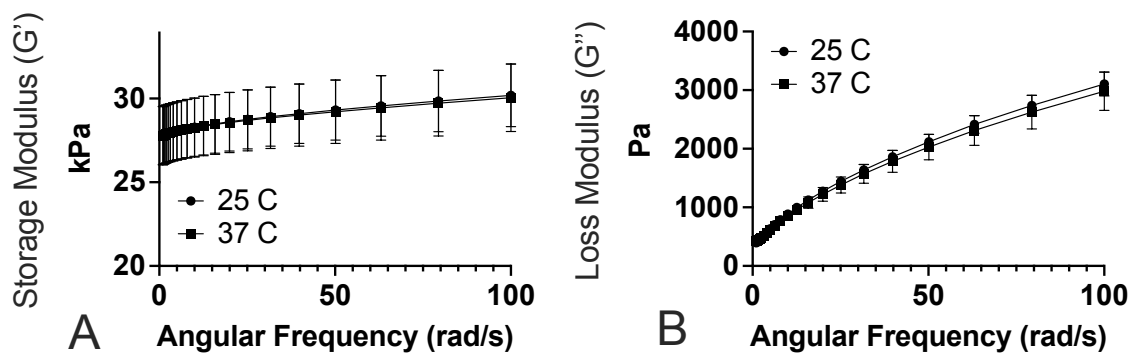

Fig. 2 Effect of Temperature on Mechanical Properties. Mechanical properties of a representative formulation were measured at either 25 °C or 37 °C using a heated stage on the rheometer. Results show that properties do not significantly change at 37 °C. Error bars represent standard error.

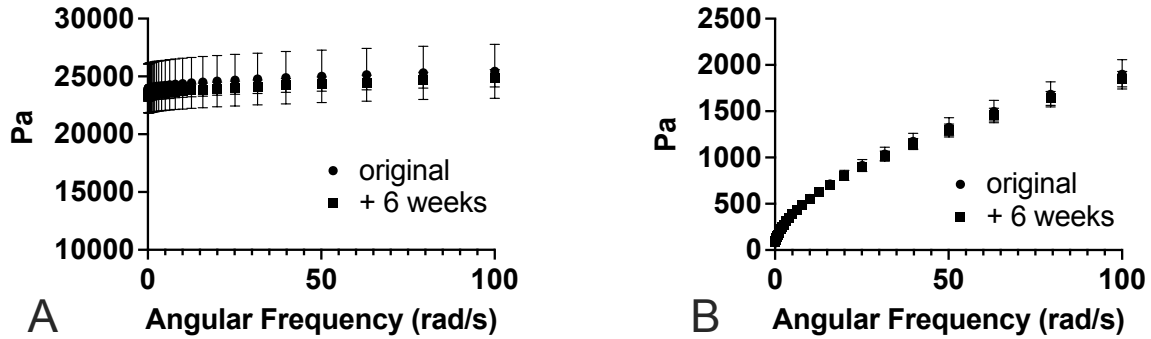

Fig. 3 Changing the Ratios of Sylgard 184 Base:Crosslinker and Sylgard 184:527 creates surfaces with varying storage and loss moduli. A-D) Storage modulus ( $G'$ ) versus decreasing Sylgard 184: Sylgard 527 ratio for (A) 5:1 B:C Sylgard 184, (B) 10:1 B:C Sylgard 184, (C) 20:1 B:C Sylgard 184, and (D) 30:1 B:C Sylgard 184. E-H) Loss modulus ( $G''$ ) versus decreasing Sylgard 184: Sylgard 527 ratio for (E) 5:1 B:C Sylgard 184, (F) 10:1 B:C Sylgard 184, (G) 20:1 B:C Sylgard 184, and (H) 30:1 B:C Sylgard 184. (I) Compiled values for storage modulus for all formulations. (J) Compiled values for loss modulus for all formulations. Error bars represent standard error. Formulations are labeled on the X-axis according to the notation (184B:184C):527.
